# Supplementary material for: Novel epitopes identified from efflux pumps of Mycobacterium tuberculosis could induce cytotoxic T lymphocyte response
Source: PeerJ journal article supplement (doi:10.7717/peerj.1229), 2015-09-22
Supplement: CTL_lysis_activity_of_the_CTLs_from_PPD-_donors.pdf [file CTL_lysis_activity_of_the_CTLs_from_PPD-_donors.pdf]

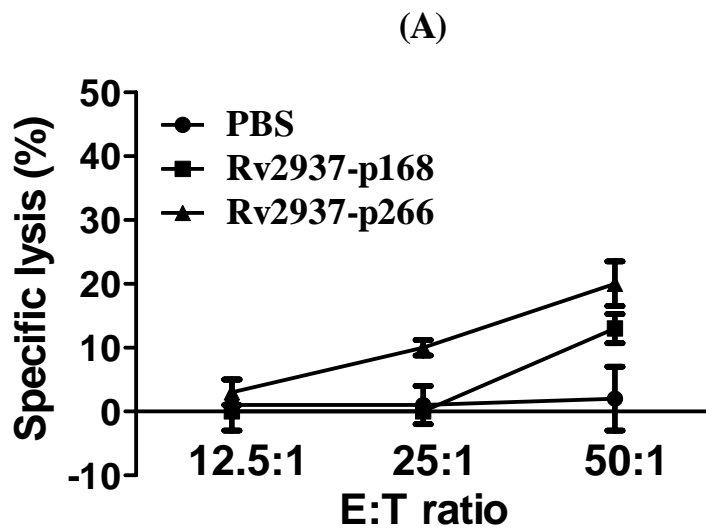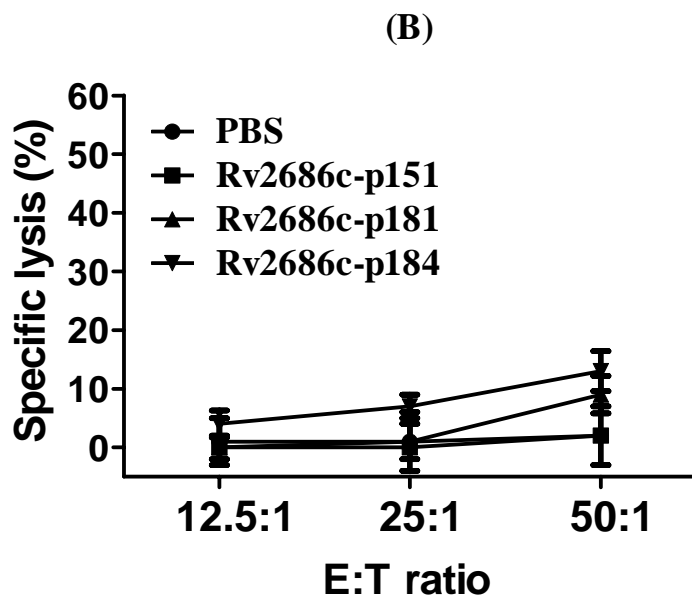

Figure S1. Specific lysis of T2 cells incubated with synthetic peptide by the CTLs generated from PBMCs of HLA-A\*02<sup>+</sup>PPD<sup>-</sup> donor.
